# Supplementary material
Source: PubMed Central journal article supplement (PMC3672188)
Supplement: cbt-14-436-s01.pdf [file cbt-14-436-s01.pdf]

## **Supplemental Material to:**

**Avijeet S. Chopra, Anton Kuratnik, Eric W. Scocchera,  
Dennis L. Wright and Charles Giardina**

**Identification of novel compounds that enhance colon  
cancer sensitivity to inflammatory apoptotic ligands**

**Cancer Biology & Therapy 2013; 14(5)**

**<http://dx.doi.org/10.4161/cbt.23787>**

**<http://www.landesbioscience.com/journals/cbt/article/23787/>**

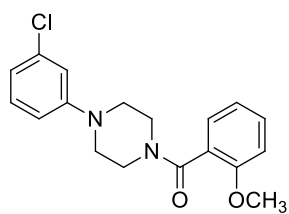

**AK3**

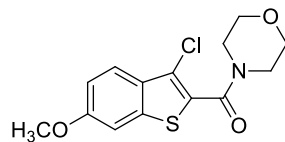

**AK7**

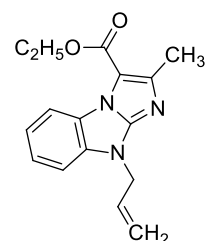

**AK8**

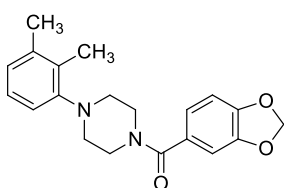

**AK10**

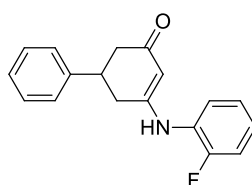

**AK16**

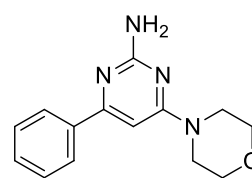

**AK17**

**Supplementary figure 1:** Structures of the compounds selected out of a screen of 400 compounds from ChemBridge DIVERSet™ library of compounds. These compounds showed the highest levels of capase-3 activity as suggested by the percentage of cells expressing cleaved capase-3.

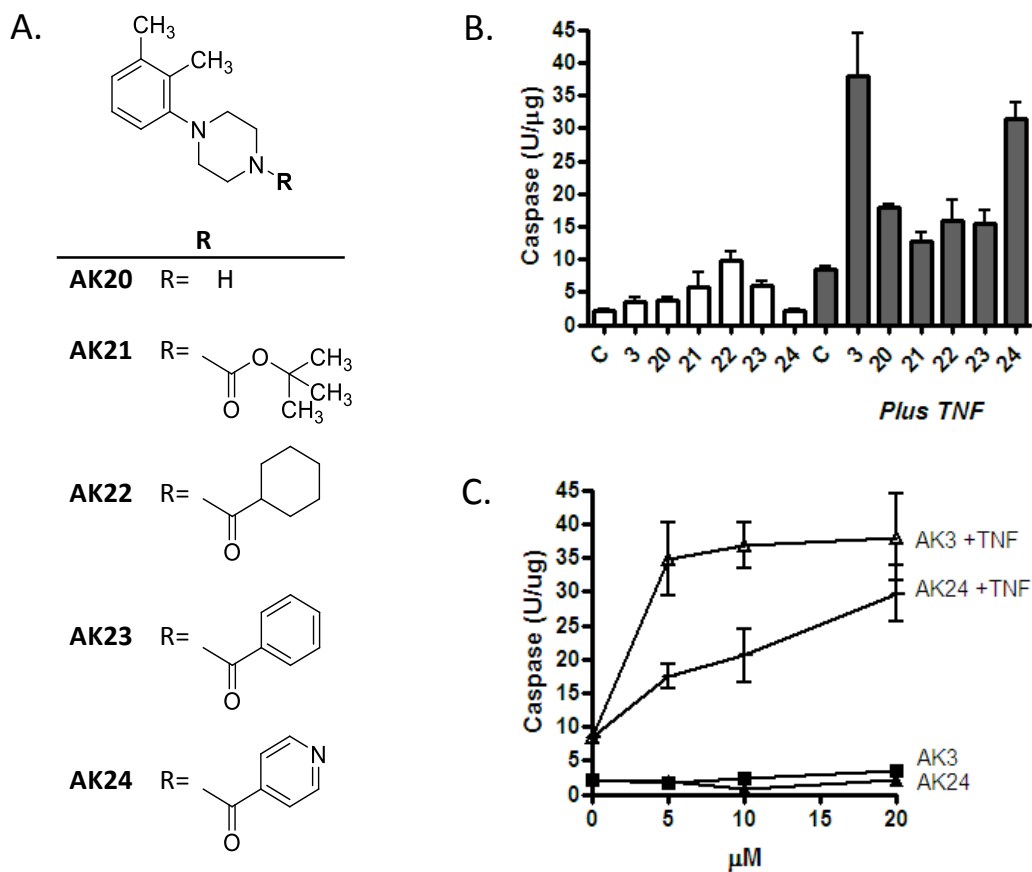

**Supplementary figure 2:** Structure-specific requirement for TNF sensitization of colon cancer cells. (A) Structural analogs of AK3 and AK10 (AK20-24) were prepared with modifications to the benzoyl group and tested for TNF-sensitizing activity. Modifications included removal of benzoyl group (AK20), substitution with *tert*-butyl (AK21), benzo[1,3]dioxol-5-yl (AK22), phenyl (AK23), and pyridin-4-yl (AK24). (B) HT-29 cells treated with analogs in A at 25  $\mu$ M and tested for their ability to enhance caspase-3 activation in a TNF-dependent manner using the DEVD-AMC cleavage assay. AK3 and AK24 induced significantly higher caspase activity than the other compounds tested (ANOVA, Tukey's post-hoc test, \*  $p < 0.05$ , \*\*  $p < 0.01$ ). (C) Dose-dependent caspase activation with AK3 and AK24 in the presence or absence of TNF was determined using the DEVD-AMC substrate. AK3 was significantly more active than AK24 at lower concentrations (\*  $p < 0.01$ ).
